# Supplementary material for: Spatial-Temporal Patterns of Viral Amplification and Interference Initiated by a Single Infected Cell
Source: PubMed Central journal article supplement (PMC4984635; doi:10.1128/jvi.00807-16), 2016-07-27
Supplement: JVI.00807-16_zjv999181865so1.pdf [file JVI.00807-16_zjv999181865so1.pdf]

Legends for supplemental movies  
Akpinar et al. 2016

Movie 1  
normal plaque growth (Fig 2)

Movie 2  
slow plaque growth (Fig 2)

Movie 3  
patchy plaque growth (Fig 2)

Movie 4  
simulated normal plaque growth (Fig 11)

Movie 5  
simulated slow plaque growth (Fig 11)

Movie 6  
simulated patchy plaque growth (Fig 11)
